# Impact of nutrient cycling on food web stability

Pierre Quévreur<sup>1</sup>, Sébastien Barot<sup>1</sup> and Élisabeth Thébault<sup>1</sup>

<sup>1</sup>*Sorbonne Universités, Sorbonne Paris Cité, Paris Diderot Univ Paris 07, CNRS, INRA, IRD, UPEC, Institut d'Écologie et des Sciences de l'Environnement – Paris, iEES-Paris, 4 place Jussieu, F-75252 Paris, France*

Corresponding author: pierre.quevreur@cri-paris.org

## Summary

1. Nutrient cycling is fundamental to ecosystem functioning. Despite recent major advances in the understanding of complex food web dynamics, food web models have so far generally ignored nutrient cycling. However, nutrient cycling is expected to strongly impact food web stability and functioning.
2. To make up for this gap, we built an allometric and size structured food web model including nutrient cycling. By releasing mineral nutrients, recycling increases the availability of limiting resources for primary producers and links each trophic level to the bottom of food webs.
3. We found that nutrient cycling can provide more than 50% of the total nutrient supply of the food web, leading to a strong enrichment effect that promotes species persistence in nutrient poor ecosystems but leads to a paradox of enrichment at high nutrient inputs, *i.e.* to destabilisation.

20 4. In addition to this enrichment effect, the presence of recycling loops linking each trophic  
21 level to the basal resources stabilises species biomass dynamics in food chains but has  
22 only weak effects in complex food webs.

23 5. This new model open perspectives for better linking studies on food web dynamics to  
24 ecosystem processes.

## 25 Key words

26 detritus, diversity, enrichment, mineral nutrients, paradox of enrichment, size structured

## 27 Introduction

28 Food web dynamics and functioning have been studied thoroughly through empirical and mod-  
29 elling approaches because food webs are essential to ecosystem functioning. A key issue is to  
30 determine the characteristics of food webs that stabilise their key properties, *e.g.* the number of  
31 species composing them, primary production or secondary production. In particular, dynami-  
32 cal models of complex food webs (*i.e.* food webs including numerous interacting species) reveal  
33 that size structured food webs (Brose *et al.*, 2006b; Heckmann *et al.*, 2012), allometric scaling  
34 of biological rates (Brose *et al.*, 2006b) and adaptive foraging (Kondoh, 2003; Heckmann *et al.*,  
35 2012) promote species coexistence and population stability. However, these models focus on  
36 population dynamics and carbon fluxes, forgetting non-living compartments (mineral nutrients  
37 and dead organic matter) and nutrient cycling. Some studies include mineral nutrients as basal  
38 resources for primary producers (Schneider *et al.*, 2016; Wang & Brose, 2017) or detritus as  
39 basal resources for bacteria (Boit *et al.*, 2012) or for species higher in the food web (Legagneux  
40 *et al.*, 2012), but they never include a complete nutrient cycling.

41

42 Nevertheless, the cycling of mineral nutrients such as nitrogen and phosphorus likely tightly  
43 interacts with food web dynamics and stability. Several studies indeed highlighted the impor-  
44 tance of nutrient cycling processes for ecosystem stability, but with contrasting results (O'Neill,  
45 1976; DeAngelis, 1980; DeAngelis *et al.*, 1989; DeAngelis, 1992; Loreau, 1994; McCann, 2011;  
46 Neutel & Thorne, 2014). DeAngelis (1980, 1992) showed that recycling affects food chain re-  
47 silience, systems with tighter recycling being less resilient. On the other hand, Loreau (1994)  
48 suggested that tighter recycling was associated with greater food chain resistance to perturba-  
49 tions, and McCann (2011) found that food chains with recycling through a detritus pool were  
50 less destabilised by nutrient enrichment than food chains without recycling. Meanwhile, Neutel  
51 & Thorne (2014) did not find clear effects of the presence of recycling loops on the resilience of  
52 complex soil food webs, some food webs being unaffected by recycling and others being either  
53 destabilised or stabilised. While the study of consequences of recycling processes on stability  
54 has largely been restricted to resilience of small food web motifs or food chains (but see Neu-  
55 tel & Thorne (2014)), understanding the consequences of nutrient cycling on the stability of  
56 complex food webs becomes crucial to predict ecosystem stability in response to perturbations.  
57 Observed contradictory results on the impact of nutrient cycling on stability might arise from  
58 the fact that nutrient cycling can affect food web stability through different mechanisms, whose  
59 importance could also differ between food chain and food web models.

60

61 First, the recycled nutrients add up to the external inputs of mineral nutrients and could lead  
62 to an enrichment effect (Loreau, 2010). Recent studies have emphasized that nutrient fluxes  
63 between ecosystems can strongly determine ecosystem functioning and stability (Leroux &  
64 Loreau, 2008; Gounand *et al.*, 2014). Effects on nutrient availability thus clearly need to be  
65 accounted for when studying recycling effects on food web stability (McCann, 2011). Nutrient  
66 cycling increases primary production (Loreau, 2010), which increases the energy transfer to

67 consumers. This could increase species persistence and sustain higher trophic levels (Abrams,  
68 1993; Binzer *et al.*, 2011). On the contrary, nutrient cycling could lead the destabilisation of  
69 food web dynamics through the increase of basal resources availability. Indeed, increasing this  
70 availability tends to increase the amplitude of population oscillations, which increases the risk  
71 of extinction. This characterises the paradox of enrichment (Rosenzweig, 1971; Rip & McCann,  
72 2011) predicted by several food chain and food web models (Roy & Chattopadhyay, 2007; Rall  
73 *et al.*, 2008; Hauzy *et al.*, 2013; Gounand *et al.*, 2014; Binzer *et al.*, 2016) and some experiments  
74 (Fussmann *et al.*, 2000; Persson *et al.*, 2001). Taken together, this leads to the hypothesis that  
75 in nutrient poor ecosystems, nutrient cycling would increase food web stability, *i.e.* species  
76 persistence and the persistence of higher trophic levels while, in nutrient rich ecosystems, nu-  
77 trient cycling would destabilise food webs. Testing this hypothesis is particularly meaningful  
78 in a context of global nutrient enrichment due to human activities (Vitousek & Reiners, 1975;  
79 Smith *et al.*, 1999).

80  
81 Second, nutrient cycling adds direct feedback loops from all trophic levels to the bottom of  
82 food webs. Besides the consequent enrichment effect, these feedback loops may affect stability  
83 (McCann, 2011; Neutel & Thorne, 2014). Because these feedback loops are positive (Fath &  
84 Hynes, 2007; Hynes *et al.*, 2007) they may have a destabilising effect causing an increase in  
85 oscillation amplitude. However, they could have the opposite effect if nutrient cycling leads to  
86 asynchronous dynamics of mineral nutrients and primary producers, as found in a food chain  
87 model (McCann, 2011). In such case, a decrease in primary producers could be dampened by a  
88 simultaneous increase in mineral nutrients availability, thus reducing population oscillations in  
89 the food chain (Brown *et al.*, 2004a). Such effects of recycling feedback loops on stability might  
90 however be weaker in complex food webs. In complex food webs, recycled nutrient inputs to  
91 detritus and mineral nutrient pools results from many feedback loops, which might attenuate

92 the fluctuations of mineral nutrient dynamics and thus limit the stabilising (resp. destabilis-  
93 ing) effect of asynchronous (resp. synchronous) fluctuations of mineral nutrients and primary  
94 producers.

95

96 Third, the effects of nutrient cycling on stability might be modulated by the ways nutrient are  
97 recycled. Consumers in food webs directly affect nutrient cycling both through immobilisation  
98 of nutrients in their biomass and through egestion and excretion of non-assimilated food (Vanni,  
99 2002). Furthermore, nutrients are excreted as mineral nutrients (direct recycling) or as detritus  
100 releasing mineral nutrients during decomposition (indirect recycling) (Vanni, 2002; Zou *et al.*,  
101 2016). Direct recycling is faster than indirect recycling because decomposition is required be-  
102 fore the return of nutrients to the mineral pool, leading to increased primary production (Zou  
103 *et al.*, 2016). Increasing the fraction of direct recycling should amplify the enrichment effect by  
104 accelerating the recycling. Increasing the decomposition rate of detritus should have a similar  
105 effect, especially if direct recycling does not prevail.

106

107 To study the consequences of nutrient cycling on food web stability, we extended the recent  
108 food web modelling approach based on allometric relations with species body mass (*e.g.* Brose  
109 *et al.* (2006b); Heckmann *et al.* (2012); Schneider *et al.* (2016); Wang & Brose (2017)) by  
110 integrating basic aspects of nutrient cycling in this framework. Species body mass relates with  
111 fundamental species traits such as metabolic or growth rates (Yodzis & Innes, 1992; Brown  
112 *et al.*, 2004b) and it is also a good predictor of trophic interactions in ecosystems (Williams  
113 & Martinez, 2000; Petchey *et al.*, 2008). Models parametrised with such allometric relations  
114 have been increasingly used to study food web dynamics and stability, especially because they  
115 allow recreating observed patterns and dynamics of complex food webs (Boit *et al.*, 2012;  
116 Hudson & Reuman, 2013). This framework thus offers a good opportunity to include nutrient

117 cycling to food web models. To disentangle the mechanisms by which nutrient cycling affects  
118 food web stability (defined by species persistence and time variability of biomass dynamics),  
119 we assessed and compared the respective impact of nutrient cycling through the addition of  
120 mineral resources and the addition of feedback loops in both a complex food web and a food  
121 chain. These aspects were critical to answer the following questions: Can nutrient cycling lead  
122 to a paradox of enrichment and how does it interact with the overall nutrient richness of the  
123 ecosystem? Can the addition of feedback loops by nutrient cycling stabilise food chains as well  
124 as complex food webs? Do the relative importance of direct and indirect nutrient cycling and  
125 the decomposition rate influence food web stability?

## 126 **Material and methods**

### 127 **General description of the model**

128 We developed a food web model including basic aspects of nutrient cycling by combining food  
129 web, allometry and stoichiometric theories (Fig. 1). Following classical allometric food web  
130 models (Brose, 2008; Heckmann *et al.*, 2012), that are based on carbon flows, species biological  
131 parameters and trophic interactions scale with their body mass. Our model adds two major  
132 abiotic compartments, mineral nutrients (*e.g.* mineral nitrogen pool) and detritus (dead or-  
133 ganic matter), to food web dynamics. Since detritus and mineral nutrient compartments are  
134 expressed in mass of nutrient whereas species compartments are expressed in mass of carbon,  
135 stoichiometry rules ensure the conversion between carbon flows and nutrient flows between the  
136 biotic and abiotic compartments and account for species stoichiometric homeostasis in the  
137 food web. Nutrients are either directly recycled (species excretion of mineral nutrients directly  
138 available for primary producers) or indirectly recycled (species excretion of detritus releasing  
139 mineral nutrients through decomposition). All stocks are expressed for an arbitrary unit of

140 habitat either a surface or a volume. The model is parametrised for nitrogen, but could be  
141 applied to other limiting nutrients such as phosphorus. The studied food chain model is a  
142 simplified version of the food web model, with only three species, a plant, a herbivore and a  
143 carnivore. It is thus built with the same equations and the same parameters than the food web  
144 model.

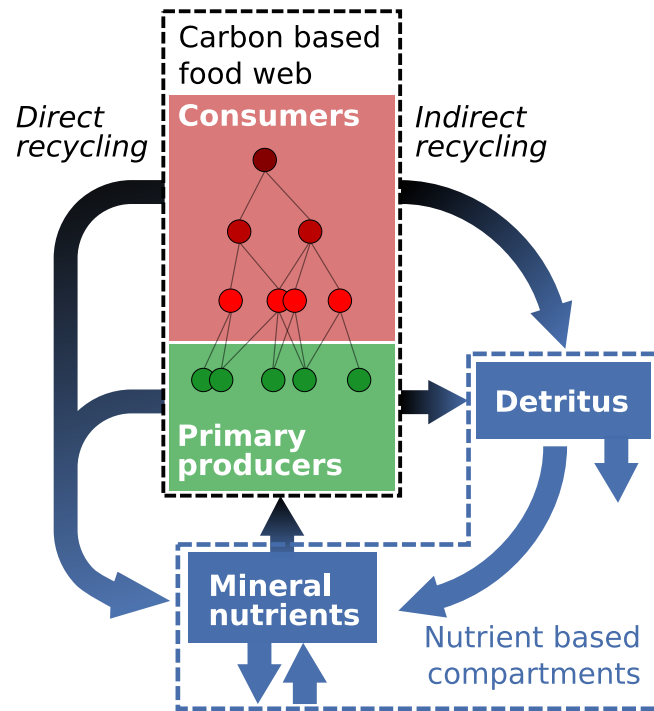

Figure 1: Schematic diagram of the modelled food web. The food web contains several primary producers and consumers forming a complex interaction network. It also includes two non-living compartments: mineral nutrients and detritus. Each organism excretes nutrients either directly as mineral nutrients (arrows on the left), or indirectly through the production of degradable detritus (arrows on the right). Stoichiometric rules ensure the conversions between the carbon based food web and the nutrient based compartments.

## 145 Predator-prey interactions in the allometric food web model

146 For modelling food web dynamics, one needs to model both the structure of the food web  
147 (*i.e.* who eats whom) and the population dynamics within the food web. To define trophic  
148 interactions between species (*i.e.* food web structure), we took inspiration from the approach of  
149 the allometric diet breath model (ADBM, [Petchey \*et al.\* \(2008\)](#); [Thierry \*et al.\* \(2011\)](#)) because  
150 it predicts well trophic interactions in real food webs from species body mass and does not

151 require additional assumptions on food web connectance (Petchey *et al.*, 2008). To each of the  
152 50 initial species is attributed a value  $c$  drawn uniformly in the interval  $[-5; 1]$ . Then, their  
153 body mass  $M$  is calculated as follow:

$$M = 10^c \quad (1)$$

154 The five smallest species are defined as primary producers, the other as consumers. The diet of  
155 consumers depends on the profitability of each prey based on prey handling (*i.e.* the lower is  
156 the handling time, the more profitable is the prey). Following Petchey *et al.* (2008) and Thierry  
157 *et al.* (2011), mass specific handling time  $h_{ij}$  of species  $j$  by the consumer  $i$  is defined by:

$$h_{ij} = \begin{cases} \frac{h_i}{b - \frac{M_j}{M_i}} \frac{1}{M_j} & \text{if } \frac{M_j}{M_i} < b \\ \infty & \text{if } \frac{M_j}{M_i} > b \end{cases} \quad (2)$$

158 With  $h_i$  a time constant (calculation detailed in the section A1 of the supporting informations),  
159  $M_j$  the body mass of the prey,  $M_i$  the body mass of the consumer and  $b$  the maximum prey-  
160 predator body mass ratio above which the prey cannot be eaten. The handling time function  
161 against prey body mass is U-shaped, handling time being minimal when prey body mass is  
162 equal to  $b/2 \times M_j$ . We consider that predators can only interact with preys within the body-  
163 mass interval  $[0.1bMi, bMi]$  with  $b < 1$  (*i.e.* predators are always larger than their prey) as the  
164 handling time increases exponentially out of this interval.

165

166 The predator-prey dynamics follow previous allometric food web models (Brose, 2008; Heck-  
167 mann *et al.*, 2012). The respective equations for primary producers (equation 3a) and consumers



168 (equation 3b) are:

$$\frac{dB_i}{dt} = r_i G_i B_i - x_i B_i - \beta_i B_i^2 - \sum_{j=\text{consumers}} B_j F_{ji} \quad (3a)$$

$$\frac{dB_i}{dt} = -x_i B_i - \beta_i B_i^2 + \sum_{j=\text{prey}} e_{ij} B_i F_{ij} - \sum_{j=\text{consumers}} B_j F_{ji} \quad (3b)$$

169 In these equations,  $B_i$  is the biomass of population  $i$ ,  $G_i$  is the nutrient-dependant growth rate  
 170 of primary producers,  $r_i$  is the mass-specific maximum growth rate of primary producers,  $x_i$   
 171 is the mass-specific metabolic rate,  $\beta_i$  is the intraspecific competition coefficient and  $e_{ij}$  the  
 172 assimilation efficiency of species  $j$  by species  $i$ . Primary producer growth rates  $r_i$  as well as  
 173 species metabolic rates  $x_i$  are defined as functions of species body masses, according to the  
 174 allometric quarter-power laws as described by [Yodzis & Innes \(1992\)](#) and [Brown \*et al.\* \(2004b\)](#):

$$r_i = r M_i^{-1/4} \quad (4a)$$

$$x_i = x M_i^{-1/4} \quad (4b)$$

175 With  $M_i$  the body mass of species  $i$  and  $r$  and  $x$  allometric constants (Table 1) (See the section  
 176 A1 in the supporting informations).

177

178  $F_{ij}$  represents the fraction of species  $j$  consumed by  $i$  and follows a Holling functional response:

$$F_{ij} = \frac{\omega_{ij} a_i B_j^q}{1 + \sum_{k=\text{prey}} \omega_{ik} a_i h_{ik} B_k^q} \quad (5)$$

179 Here  $B_j$  represents the biomass of the prey  $j$ ,  $q$  is the Hill exponent (the functional response is of

180 type II if  $q = 1$  or type III if  $q = 2$ ),  $a_i$  is the attack rate of consumer  $i$  and  $h_{ik}$  is the handling  
181 time of  $k$  by consumer  $i$ .  $\omega_{ij}$  is the preference of  $i$  for the prey  $j$ . We chose here to model  
182 preferences as time variables and not as fixed parameters according to the adaptive foraging  
183 theoretical framework (results with preferences as fixed parameters are available in section A3  
184 in the supporting informations). Adaptive foraging is indeed an important aspect of predator-  
185 prey interactions (*e.g.* predator foraging efforts depend on prey availability) and it strongly  
186 affects food web dynamics (Kondoh, 2003; Uchida & Drossel, 2007; Heckmann *et al.*, 2012).  
187 The dynamics of foraging efforts were modelled through changes over time of the consumer  
188 preferences  $\omega_{ij}$  according to the following equation:

$$\frac{d\omega_{ij}}{dt} = A\omega_{ij}\left(\frac{\partial g_i}{\partial \omega_{ij}} - \sum_{k=prey} \omega_{ik} \frac{\partial g_i}{\partial \omega_{ik}}\right) \quad (6)$$

189 Here,  $A$  represents the adaptive rate of the diet preference and  $g_i$  the total growth rate of species  
190  $i$  defined such as  $\frac{dB_i}{dt} = g_i B_i$ . The initial value of  $\omega_{ij}$  is set assuming a uniform distribution  
191 among preys and during the simulation, the  $\omega_{ij}$  are rescaled after the resolution of equation 6  
192 to keep the relation  $\sum_{k=prey} \omega_{ik} = 1$  true at each time step.

## 193 From a carbon-based food web model to an ecosystem model including 194 nutrient cycling

195 To expand the classical food web model to take fundamental aspect of nutrient cycling into  
196 account, we model the dynamics of two abiotic compartments, mineral nutrients  $N$  and detritus  
197  $D$ . These compartments are described as masses of nutrient while species biomass is based on  
198 carbon in the food web model. We use species carbon to nutrient ratios (C:N)  $\alpha_i$  to convert  
199 carbon flows into nutrient flows (and vice versa).

200 The dynamics of nutrients in the mineral and detritus compartment are described by:

$$\frac{dN}{dt} = I - \ell N + dD + \delta \underbrace{\sum_{i=\text{diversity}} \frac{x_i B_i + \beta_i B_i^2}{\alpha_i}}_{\text{direct recycling}} - \underbrace{\sum_{i=\text{primary producer}} \frac{r_i G_i B_i}{\alpha_i}}_{\text{primary producers uptake}} \quad (7a)$$

$$\frac{dD}{dt} = -\ell N - dD + \underbrace{\sum_{i=\text{consumer}} \sum_{j=\text{prey}} \frac{(1 - e_{ij}) B_i F_{ij}}{\alpha_{Dij}}}_{\text{non assimilated biomass}} + (1 - \delta) \underbrace{\sum_{i=\text{diversity}} \frac{x_i B_i + \beta_i B_i^2}{\alpha_i}}_{\text{indirect recycling}} \quad (7b)$$

201 We consider an open ecosystem where  $I$  is the constant input of nutrients (*e.g.* through erosion  
 202 or atmospheric deposition) and  $\ell$  is the rate of loss of mineral nutrients and detritus (*e.g.*  
 203 through leaching, sedimentation).

204 The nutrient-dependant growth rate of primary producers is expressed as (DeAngelis, 1980;  
 205 DeAngelis *et al.*, 1989):

$$G_i = \frac{N}{K_i + N} \quad (8)$$

206 where  $K_i$  is the half saturation constant of nutrient up-take of primary producer  $i$ . The nutrient  
 207 uptake by primary producer (expressed as a nutrient flow) is calculated by dividing the growth  
 208 rate of primary producers (expressed as a carbon flow) by their C:N ratio.

209 Detritus are decomposed at a constant rate  $d$ . Organisms release nutrients through excretion  
 210 and mortality to the detritus and mineral nutrient pools. A fraction  $\delta$  of these nutrients is  
 211 released in their mineral form (urine for instance) while the remaining fraction is released as  
 212 dead organic matter (detritus like feces, dead bodies, litter fall...) (Fig. 2A)(Zou *et al.*, 2016).

213 We assume that the nutrients contained in the non-assimilated biomass ( $e_{ij}$  fraction of the  
 214 eaten biomass) go in the detritus.

215 The amount of nutrients released by species in the food web depends on their C:N ratio  $\alpha_i$ .  
216 The carbon to nutrient ratio of non-assimilated biomass  $\alpha_{Dij}$  depends on both the C:N ratio  
217 of the prey  $j$  and of the consumer  $i$  (calculation detailed in the section A1 of the supporting  
218 informations):

$$\alpha_{Dij} = \frac{\alpha_j \alpha_i (1 - e_{ij})}{\alpha_i - \alpha_j e_{ij}} \quad (9)$$

## 219 **Assessing nutrient cycling effects on stability**

220 Stability was assessed by two complementary measures: species persistence and average coef-  
221 ficient of variation of species biomass (CV). To investigate the effects of nutrient cycling on  
222 food web dynamics and disentangle effects due to enrichment from effects due to presence of  
223 additional loops, each food web is studied for three configurations of nutrient cycling (Fig. 2).  
224 (1) No nutrient cycling with the fraction of direct recycling  $\delta$  and the decomposition rate  $d$  set  
225 to zero. This corresponds to the dynamics obtained with classic allometric food web models  
226 and will be referred as the NC model (No Cycling) (Fig. 2A). (2) With nutrient cycling with  
227 the fraction of direct recycling  $\delta$  and the decomposition rate  $d$  strictly positive (Fig. 2B). This  
228 food web is referred as the C model (Cycling). (3) No nutrient cycling but the enrichment  
229 effect of nutrient cycling is simulated (Fig. 2C). This food web is referred as the SC model  
230 (Simulated Cycling). In this last case, we remove the potential effect of the coupling between  
231 higher trophic levels and the basal resource due to the presence of recycling loops while keeping  
232 the additional inputs of nutrients associated with nutrient cycling. To simulate the enrichment

233 effect of nutrient cycling, we replaced the basal nutrient input by the total nutrient input  $I_{tot}$ :

$$I_{tot} = I + I_{recy} \quad (10)$$

234 With  $I$  the external nutrient input and  $I_{recy}$  the average quantity of recycled nutrients.

235 In addition to the complex food web, a tri-trophic food chain (*i.e.* with three species) is build

236 to track the effects of nutrient cycling in a simpler system. The tri-trophic food chain is ruled

237 by the same equations than the complex food web except for the adaptive foraging that is not

238 relevant in such a model.

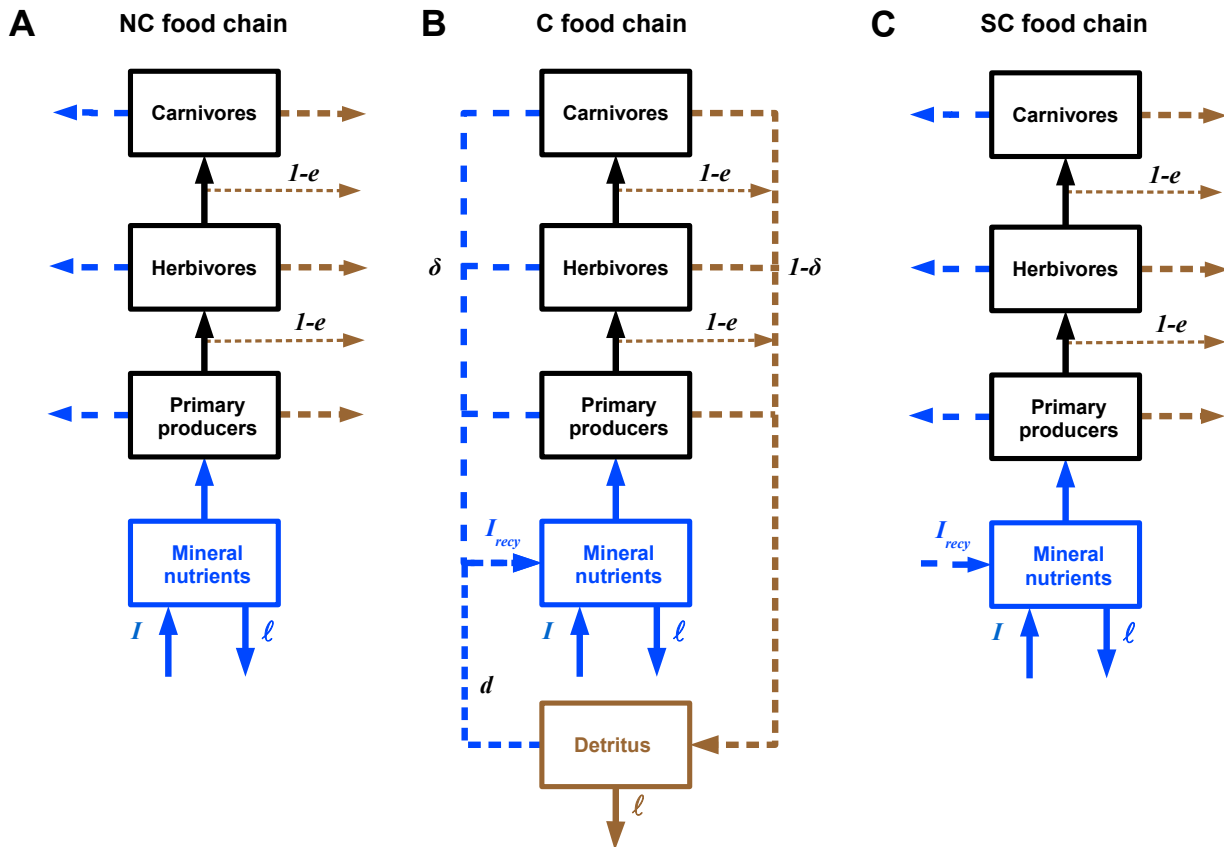

Figure 2: Diagram of the general structure of our models with and without nutrient cycling feedback loops. The dotted arrows represent nutrient cycling (nutrient flux in blue, detritus in brown). **A)** NC model. Food chain without nutrient cycling. **B)** C model. Food chain with nutrient cycling. A fraction  $\delta$  of nutrients is excreted as mineral nutrients (direct recycling on the left) and a fraction  $1 - \delta$  plus the fraction  $1 - e$  of non ingested biomass are excreted as detritus (indirect recycling on the right). The total nutrient input  $I_{tot}$  in the pool of mineral nutrients is the sum of the external nutrient input  $I$  and the recycled nutrient  $I_{recy}$ . **C)** SC model. Food web without nutrient recycling but with corrected nutrient input that is equal to  $I_{recy}$ . The resulting food web does not have the feedback loop induced by nutrient cycling but has an equivalent nutrient availability than in the food web with nutrient recycling. Note that the first version of our model (NC) is based on the C model where  $I_{recy}$  is set to 0.

## 239 Simulations

240 All the parameters, their units and their values as used in the simulations are given in the  
 241 table 1. The sensitivity of the results to arbitrarily set parameters is in the section A3 in the  
 242 supporting informations. The simulations are performed with *C++* and the *GSL* ode solver  
 243 using the Runge-Kutta-Fehlberg (4, 5) method with an adaptive time step and an absolute  
 244 accuracy of  $10^{-6}$ . Simulations are run for 10,000 years and the outputs recorded for the last

245 1000 years. Species persistence is measured as the ratio of the final number of species at  
246  $t = 10,000$  to the initial number of species at  $t = 0$ . The CV is the ratio of the standard  
247 deviation to the mean of species biomass or recycled quantity of nutrients over time, calculated  
248 for the 1000 last years of each simulation. Each combination of parameters is tested for 100  
249 different food webs (*i.e.* different randomly drawn sets of species body mass), each of these  
250 food webs being simulated in the three configurations of nutrient cycling (*i.e.* for the NC, C  
251 and SC models). To implement the SC model, we recorded the density of each compartment  
252 in the simulation of the C model at  $t = 9,000$  and the averaged quantity of recycled nutrient  
253  $I_{recy}$  recorded for the last 1,000 years. We then ran corresponding food web simulations for the  
254 SC model (*i.e.* with  $\delta = d = 0$  and  $D = 0$ ) for 1000 years with initial densities and a nutrient  
255 input  $I$  respectively set equal to the densities and  $I_{tot}$  recorded in the C model.

256 In each simulation for complex food webs, there are initially 50 species and their initial biomass  
257 is set at  $10 \text{ kg.v}^{-1}$  for primary producers and at  $5 \text{ kg.v}^{-1}$  for consumers ( $v$  is an arbitrary metric  
258 of space, see table 1). Initial quantities of nutrients in the mineral nutrients and detritus pools  
259 are set at  $10 \text{ kg.v}^{-1}$ . In the simulations for the food chain model, the body masses of the  
260 primary producer, the herbivore and the carnivore are respectively 1, 10 and 100 kg, and their  
261 initial biomass are respectively 1, 0.5 and  $0.1 \text{ kg.v}^{-1}$ .

|               | Value and units                                        | Description                                                      | Reference                      |
|---------------|--------------------------------------------------------|------------------------------------------------------------------|--------------------------------|
| $B_i$         | $kg.v^{-1}$                                            | Biomass (carbon) of species $i$                                  | Variable (equation 3a, 3b)     |
| $N$           | $kg.v^{-1}$                                            | Mineral nutrient (nitrogen)                                      | Variable (equation 7a)         |
| $D$           | $kg.v^{-1}$                                            | Detritus (nitrogen)                                              | Variable (equation 7b)         |
| $\omega_{ij}$ | Dimensionless                                          | Preference of predator $j$ for prey $i$                          | Variable (equation 6)          |
| $r$           | $0.87 kg^{1/4}.year^{-1}$                              | Growth rate allometric constant                                  | Binzer <i>et al.</i> (2012)    |
| $x$           | $0.12 kg^{1/4}.year^{-1}$<br>$0.27 kg^{1/4}.year^{-1}$ | (primary prod.) Metabolic rate<br>(consumer) allometric constant | Brose (2008)                   |
| $h_j$         | $year.kg^{-1}$                                         | Handling time                                                    | Section A1 supp. inf.          |
| $a_i$         | $0.1 v.year^{-1}$                                      | Attack rate                                                      | Arbitrary                      |
| $\beta_i$     | $0.001 v.kg^{-1}.year^{-1}$                            | Intraspecific competition coefficient                            | Arbitrary                      |
| $e_{ij}$      | 0.45 (herbivore)<br>0.85 (carnivore)                   | Assimilation efficiency of species $j$<br>eaten by species $i$   | Yodzis & Innes (1992)          |
| $q$           | 1                                                      | Hill exponent                                                    | Brose <i>et al.</i> (2006b)    |
| $A$           | 0.01                                                   | Adaptive rate                                                    | Arbitrary                      |
| $b$           | 0.05                                                   | Max prey-predator body mass ratio                                | Brose <i>et al.</i> (2006a)    |
| $\alpha_i$    | 6.6 (primary prod.)<br>5 (consumer)                    | Carbon to nutrient ratio                                         | Anderson (1992)                |
| $K_i$         | $10 kg.v^{-1}$                                         | Half saturation of nitrogen uptake                               | Arbitrary                      |
| $\ell$        | $0.2 year^{-1}$                                        | Leaching rate                                                    | Arbitrary                      |
| $M_i$         | $kg$ (of C)                                            | Body mass of species $i$                                         | Log uniform in $[10^{-5}, 10]$ |
| $I$           | $kg.v^{-1}.year^{-1}$                                  | External nutrient input                                          | $[0, 400]$                     |
| $d$           | Dimensionless                                          | Decomposition rate of detritus                                   | $[0, 1]$                       |
| $\delta$      | Dimensionless                                          | Fraction of direct recycling                                     | $[0, 1]$                       |

Table 1: Table of parameters and variables.  $v$  represents a generic metric of space (*e.g.* that could represent liters or square meters). Indeed all the parameters depending on space are set arbitrarily and thus we do not need to specify a particular unit of space.

## 262 Results

### 263 Overall effects of nutrient cycling on food web dynamics

264 Nutrient cycling contributes to an important part of the total mineral inputs of nutrients in  
265 the food web, and its contribution varies with the levels of external inputs of nutrients (Fig.  
266 3A), in parallel with variations of total biomass in the food web and primary production (see  
267 Fig. A2-3 in the supporting informations). Nutrient cycling always represents larger inputs of  
268 nutrients to the food web than external inputs. At low nutrient enrichment levels, consumers  
269 are responsible for most of the recycling. However, at high nutrient enrichment levels, the  
270 quantity of nutrient recycled by consumers stops increasing while the total quantity of nutrient



271 recycled still increases linearly with the external nutrient input  $I$  due to a large increase in the  
272 quantity of nutrient cycled by primary producers. A similar relation is observed for the primary  
273 and the secondary productions (see Fig. A2-4C in the supporting informations).

274 Nutrient cycling affects the relationship between nutrient enrichment (*i.e.* external nutrient  
275 inputs) and food web stability (Fig. 3). First, it affects the relationship between species  
276 persistence and nutrient enrichment (Fig. 3B). In either food webs with and without nutrient  
277 cycling, persistence follows a hump-shaped relationship with external nutrient input  $I$ : first  
278 there is a sharp increase of the persistence for low nutrient inputs, then a plateau with maximum  
279 persistence (area outlined in dark grey for the C food webs) and finally a decrease of the  
280 persistence for high nutrient inputs. However, maximum persistence is reached for lower input  
281 values and effects of enrichment are sharper for the case with nutrient cycling than for the  
282 case without nutrient cycling. These sharp changes in species persistence along the gradient of  
283 nutrient enrichment are paralleled by strong changes in food web maximum trophic level with  
284 an increase and then a decrease of the maximum trophic level with increasing external nutrient  
285 input  $I$  (See Fig. A2-2C in the supporting informations).

286 Second, nutrient cycling affects the relation between the average coefficient of variation (CV)  
287 of the species biomass and nutrient enrichment (Fig. 3C). While the average CV of species  
288 biomass increases monotonically with nutrient enrichment when there is no nutrient cycling,  
289 it shows a saturating relationship in food webs with nutrient cycling. In this case, the CV of  
290 species biomass increases at low input values but it stop increasing at high nutrient enrichment.

291 However, high CVs only occur in food webs with surviving consumers (Fig. A2-2B and A2-2D  
292 in the supporting informations). The CV of the quantity of recycled nutrients follows a hump-  
293 shaped relation with external nutrient input  $I$  but the temporal variability of the quantity of  
294 recycled nutrients is about 25 times smaller than the CV of species biomass (see also Fig. A2-1  
295 in the supporting informations).

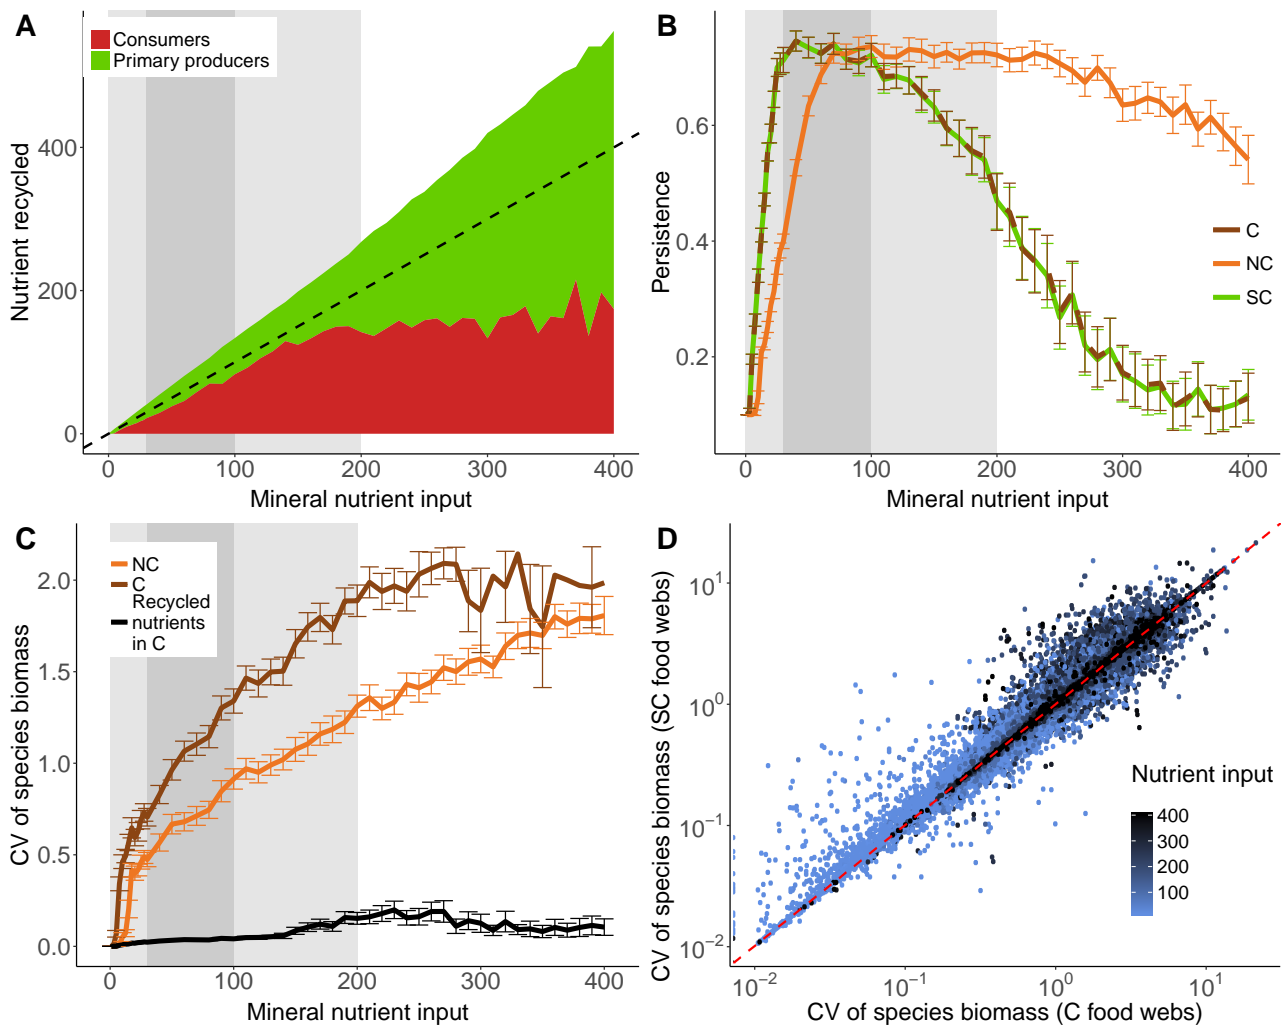

Figure 3: Overall effects of nutrient cycling on nutrient supply and food web dynamics in the complex food web model. **A)** Quantity of recycled nutrients by primary producers (green) and consumers (red) along a nutrient enrichment gradient (average of simulated food webs where at least one species persists). The dashed line is the bisector symbolising the case where the quantity of recycled nutrient is equal to the external nutrient input  $I$ . The light grey domain (for  $I$  in  $[0, 200]$ ) emphasises the mineral nutrient input range where the quantity of nutrients recycled by consumers increases. **B)** Effects of nutrient cycling on species persistence (proportion of species surviving at the end of simulations) along a nutrient enrichment gradient. Each point represents the average persistence of 100 simulated food webs. The brown dashed curve represents the C food webs with nutrient cycling ( $\delta = 0.2$ ,  $d = 0.2$ ), the orange curve represents the NC food webs without nutrient cycling and the green curve represents the SC food webs without nutrient recycling but with a mineral nutrient input simulating the enrichment effect of nutrient cycling in the C food web. The dark grey domain emphasises the plateau of maximal species persistence in the C food webs. **C)** Effect of the external nutrient input  $I$  on the average coefficient of variation (CV) of species biomass (error bars represent the confidence interval of the mean) in C food web (brown) and in NC food webs (orange). Each point represents the average of simulated food webs where at least one species persists. The black curve represents the average CV of the quantity of recycled nutrients in C food webs. **D)** CV of the species biomass in C food webs versus in the SC food webs. Each dot represents the average CV of one species of one food web in its C and SC versions. The dashed red line is the bisector and the color scale represents the external nutrient input  $I$ .

296 **Influence of the recycling parameters**

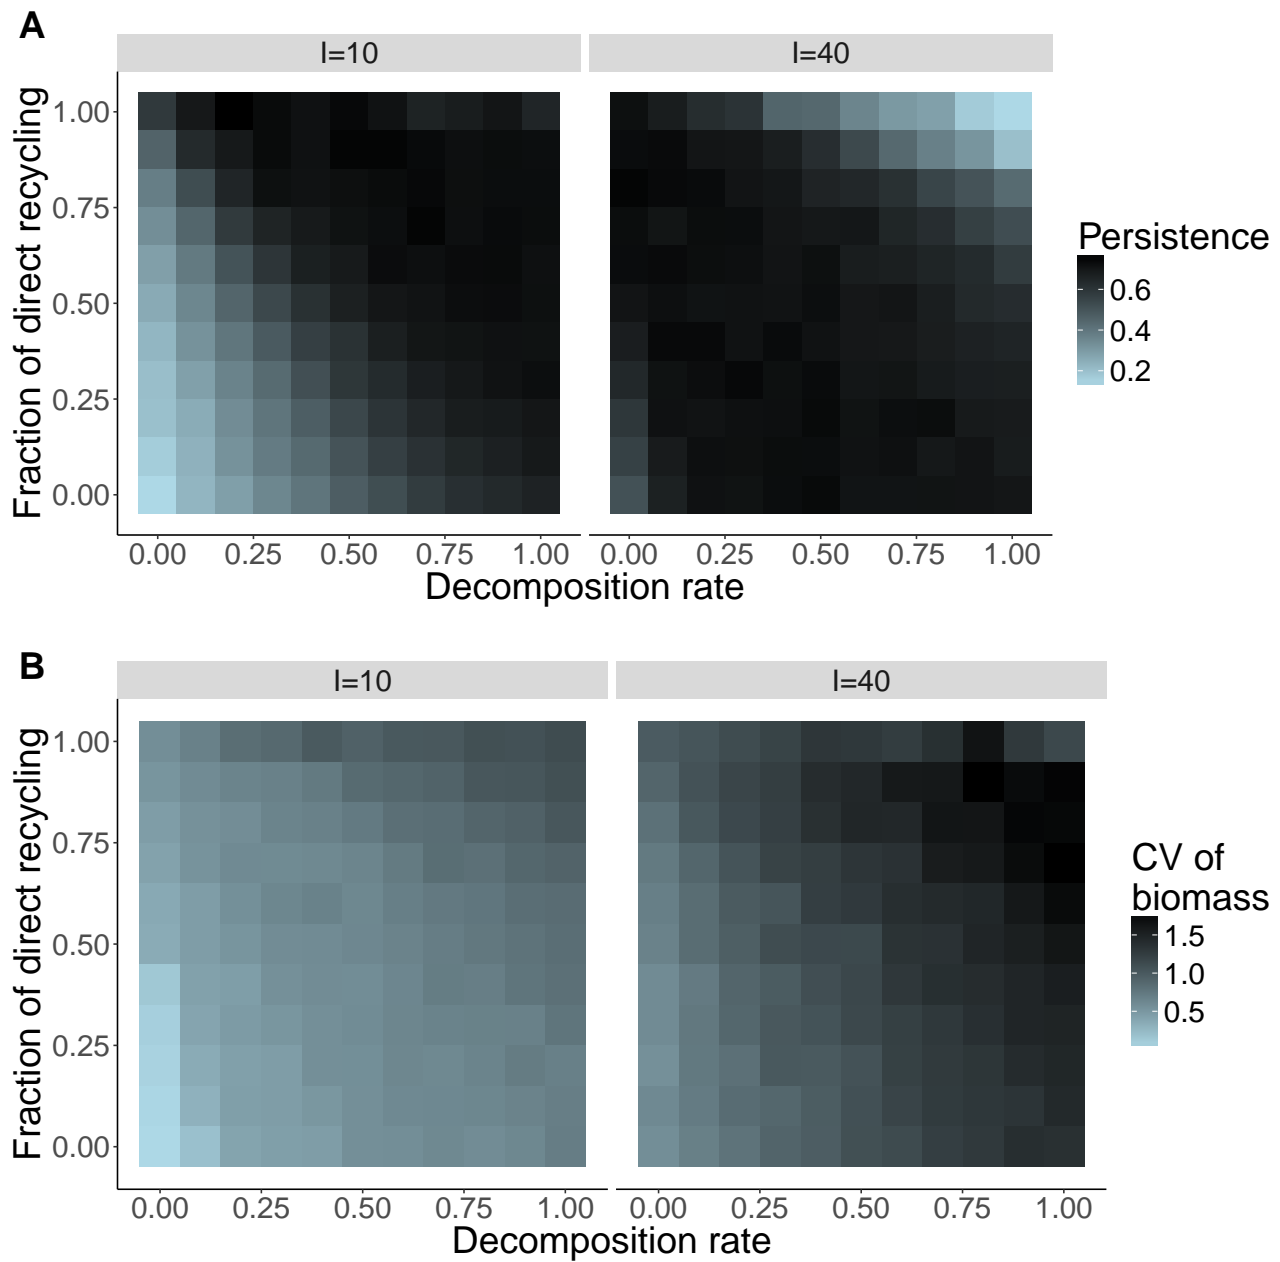

Figure 4: Effect of the recycling parameters  $d$  (detritus decomposition rate) and  $\delta$  (fraction of direct recycling) in the complex food web model **A**) on species persistence and **B**) on the average coefficient of variation of the biomass of species for  $I = 10$  and  $I = 40$ . In **A**), each square represents the average value for 100 replicates while in **B**) it represents the average value for persistent food webs only (*i.e.* food webs where at least one species persists).

297 Both the decomposition rate and the fraction of directly recycled nutrients affect species persis-  
298 tence and the coefficient of variation of species biomass (Fig. 4). When  $I = 10$ , increasing the  
299 decomposition rate  $d$  and the fraction of directly recycled nutrients  $\delta$ , increases the persistence  
300 (Fig. 4A) and the average CV of species biomass (Fig. 4B). When  $I = 40$ , increasing  $d$  and  $\delta$

301 first increases and then decrease persistence while the average CV of species biomass increases  
302 and stays at its maximum value. Increasing  $d$  and  $\delta$  always increases the quantity of recycled  
303 nutrients in the food web (Fig. A2-5 in the supporting informations) and it further affects food  
304 web maximum trophic level in the same way than species persistence.

305 **Effects of nutrient cycling: enrichment vs feedback loop**

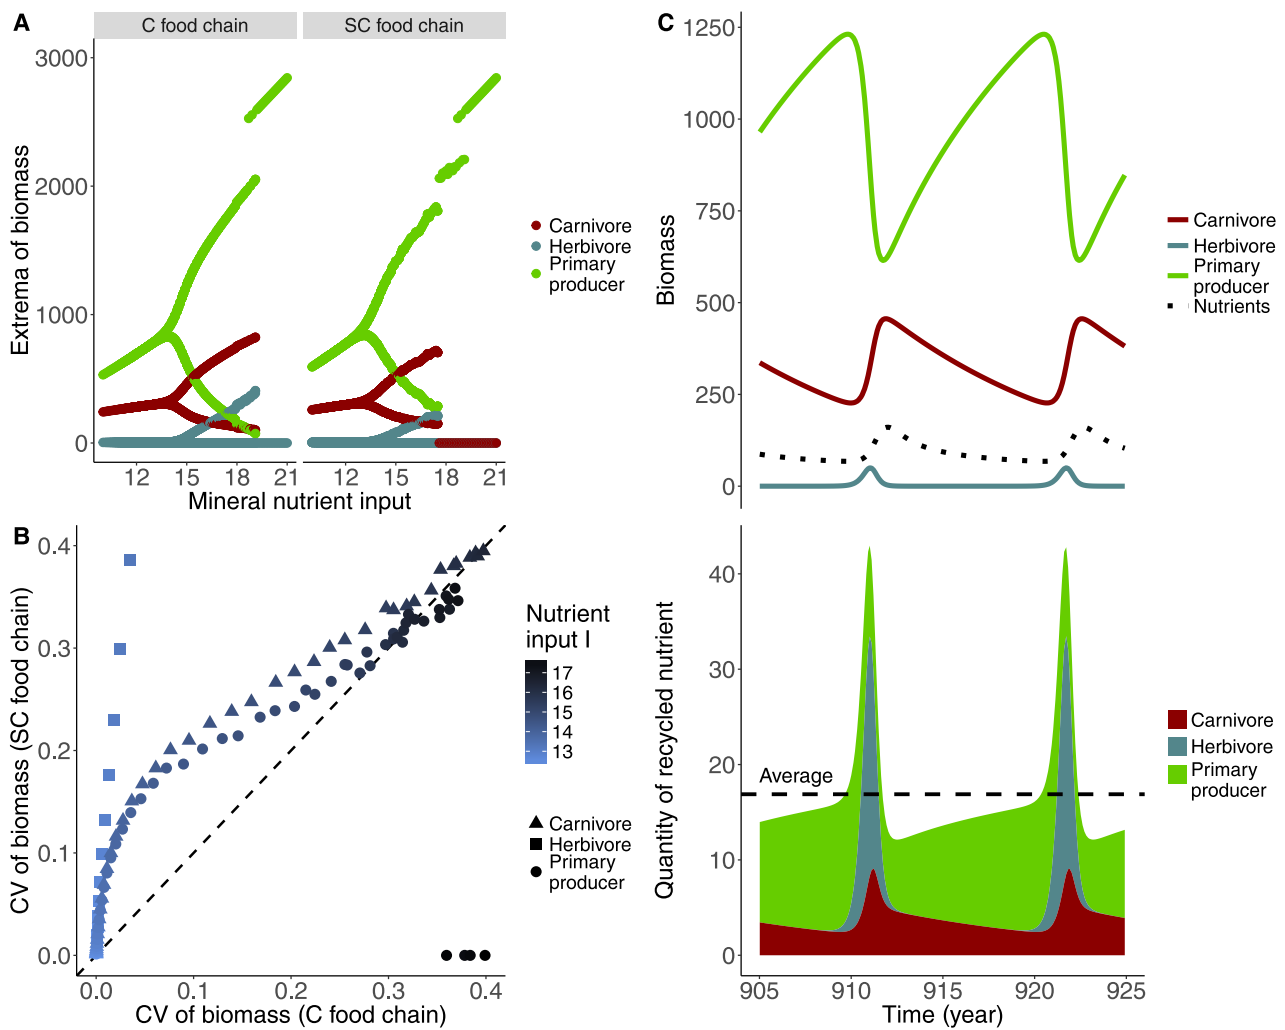

Figure 5: Effect of the feedback loop in a tri-trophic food chain. **A**) Diagram of bifurcation of species biomass (minima and maxima of biomass in dynamics) in a tri-trophic food chain (plant, herbivore and carnivore) along a nutrient enrichment gradient. Two cases are represented: a case with nutrient cycling (C food chain) and a case without nutrient cycling but with a simulated enrichment due to nutrient cycling (SC food chain). **B**) CV of the species biomass in the C food chain versus the SC food chain. The dashed line represents the bisector and the color scale represents the nutrient input  $I$ . In order to improve the readability, values on the y axis above 0.4 (corresponding to herbivore CV) are not shown but herbivore CV response to enrichment is qualitatively similar to plant's and carnivore's one. **C**) Dynamics of the biomass of species and the mineral nutrients compartment (values of the mineral compartment have been magnified by 30 for more readability) and of the quantity of nutrients recycled by each trophic level in the C food chain ( $I = 15$ ,  $\delta = 0.2$ ,  $d = 0.2$ ). The dashed line represents the average quantity of recycled nutrients.

306 The comparison between the case with nutrient cycling (case C) and the case without nutrient  
 307 cycling but with a nutrient input simulating the enrichment effect of nutrient cycling (case  
 308 SC) allows to separate the effects of nutrient cycling due to enrichment from those due to the

309 creation of additional feedback loops from each trophic levels to the bottom of the food web.  
310 When we model food web dynamics without nutrient cycling but including the enrichment  
311 effect of nutrient cycling (*i.e.* SC case), the relationships between external nutrient inputs and  
312 species persistence or biomass CV are the same than in presence of nutrient cycling (Fig. 3B  
313 and A2-2A in the supporting informations). Indeed, the curves corresponding to C and SC  
314 strongly overlap. Most of the effects of nutrient cycling on food web stability are thus due to  
315 an enrichment effect caused by recycled nutrients. Weak effects of the addition of recycling  
316 loops appear when we compare more closely the CV of species in individual food webs with or  
317 without these loops (Fig. 3D). Although the CVs of species are strongly correlated between  
318 the C and SC simulations, at low nutrient inputs species biomasses are generally less variable  
319 over time in food webs when recycling adds feedbacks loops (see Fig. A2-6 in the supporting  
320 informations).

321 In simple food chain models, as in complex food webs, effects of nutrient cycling on stability  
322 are mainly due to an enrichment effect (Fig. 3A and Fig. A2-7A in supporting informations).  
323 The variability of species biomasses increases with nutrient inputs and with comparable CV  
324 values in both the C and SC cases (see Fig. A2-7B in the supporting informations). However,  
325 a stabilising effect of the recycling loops, already observed in the food webs, appears more  
326 clearly in the food chain model (Fig. 5B and Fig. A2-7C in supporting informations). For low  
327 nutrient inputs, the CV of biomass is higher in the SC food chain, especially for herbivores. In  
328 addition, the herbivore and carnivore go extinct at lower threshold value of increased inputs  
329 in the SC case than in the C case (Fig. 5A). Contrary to what we found in the complex  
330 food web model (Fig. 3C), the temporal variabilities of the quantity of recycled nutrients and  
331 of species biomasses are of similar magnitude in the food chains (Fig. 5C and A2-7B in the  
332 supporting informations). While the total quantity of recycled nutrient is below the average  
333 recycled quantity during most of the dynamic, it picks for a short time when primary producer

334 biomass and primary production (see Fig. A2-7D in supporting informations) decrease while  
335 herbivore and carnivore biomasses increases.

## 336 Discussion

337 By integrating nutrient cycling, our food web model allows to better link population dynamics  
338 and ecosystem functioning. Results of this model highlight that nutrient cycling strongly affects  
339 food web dynamics and its response to nutrient enrichment. We show that the effects of  
340 nutrient cycling on food web stability are mostly due to the increased nutrient availability (*i.e.*  
341 enrichment effect due to efficient recycling) that promotes species persistence at low nutrient  
342 inputs but leads to a paradox of enrichment at high level of nutrient inputs. The addition  
343 by nutrient cycling of feedback loops from each species to the bottom resource has a clear  
344 stabilising effect in food chains but only weakly affects the stability of complex food webs.  
345 These results are thoroughly discussed below and their sensitivity to the parameters (Table 1)  
346 is tested in section A3 in the supporting information.

### 347 Nutrient cycling and enrichment effects

348 Our results show that nutrient cycling mainly affects food web stability through its impacts  
349 on nutrient availability in ecosystems. Indeed, effects of increased inputs of nutrients on food  
350 web stability are qualitatively similar with and without nutrient cycling but they occur for  
351 lower inputs when nutrient cycling is present. Similarly, factors increasing recycling speed and  
352 the effectively recycled nutrient quantity (*i.e.* higher decomposition rate and fraction of direct  
353 recycling) lead to stability values that are obtained for increased levels of nutrient inputs in  
354 food webs with a slower nutrient cycling.

355

356 In agreement with previous food web studies (Rall *et al.*, 2008; Binzer *et al.*, 2016), we ob-

357 serve two contrasting responses of species diversity and food web stability to increased nutrient  
358 availability. While higher nutrient availability consistently increases the temporal variability  
359 of species biomasses, it also increases species persistence in nutrient poor ecosystems (*i.e.* low  
360 external nutrient inputs) but leads to decreased persistence at high inputs of nutrients. The  
361 increase in persistence at low nutrient inputs is likely due to the increased persistence of species  
362 at higher trophic levels (Fig. A2-2C). Higher trophic levels are known to require a sufficient  
363 ecosystem productivity (limited by nutrient availability) to meet their energetic requirement  
364 and persist (*e.g.* [Oksanen \*et al.\* \(1981\)](#); [Abrams \(1993\)](#); [Leibold \(1996\)](#)), which can explain  
365 why increased persistence is only found in our case for nutrient poor ecosystems. The observed  
366 increase in the amplitude of species biomass oscillations (*i.e.* increase of species CVs) with  
367 increasing nutrient inputs is typical of the well-known paradox of enrichment ([Rosenzweig,  
368 1971](#); [DeAngelis, 1992](#); [Roy & Chattopadhyay, 2007](#); [Rip & McCann, 2011](#)). In accordance  
369 with our model results, the paradox of enrichment has been found in complex food web models  
370 with type II functional responses ([Rall \*et al.\*, 2008](#); [Binzer \*et al.\*, 2016](#)). While the use of type  
371 III functional responses removes in our model the destabilising effect of nutrient enrichment  
372 (Fig. A3-3, see also [Rall \*et al.\* \(2008\)](#)), adaptive foraging as included in our study does not  
373 prevent the occurrence of the paradox of enrichment (Fig. A3-2) as already observed by [Mougi  
374 & Nishimura \(2008\)](#) in a one predator-two prey model. Such destabilising effects of nutrient  
375 availability on species dynamics might explain the decrease in species persistence we observe  
376 at high levels of nutrient inputs. In case of type III functional responses where no such desta-  
377 bilising effects occur, persistence does not decline at high levels of nutrient availability (Fig.  
378 A3-3). Large oscillations of species biomass caused by nutrient enrichment likely trigger species  
379 extinctions as their biomass might reach the extinction threshold value, thus counteracting the  
380 positive effect of nutrient enrichment on persistence at low nutrient levels and resulting in an  
381 hump-shaped relationship between species persistence and nutrient enrichment.



382

383 Our results highlight that effects of nutrient cycling on nutrient availability are key to under-  
384 stand consequences of nutrient cycling on food web dynamics in ecosystems. Several mecha-  
385 nisms can determine how nutrient cycling affect nutrient availability in our model. First, the  
386 efficiency of nutrient cycling, as defined by the proportion of nutrient that is recycled without  
387 being leached out of the ecosystem, has been shown to increase the total amount of mineral  
388 nutrient circulating in the ecosystem and primary production (DeAngelis, 1980; de Mazancourt  
389 *et al.*, 1998; Barot *et al.*, 2007; Loreau, 2010). In our model, detritus just represent a pool of nu-  
390 trient unavailable for primary producers and increase the probability of a nutrient to be lost by  
391 the ecosystem as the loss rate is the same as in the mineral nutrient pool. Increasing the direct  
392 recycling and the decomposition rate respectively decreases the proportion of nutrient passing  
393 through the detritus pool and the residence time of nutrient contained in detritus, leading to  
394 increased nutrient availability. This suggests that the impact of nutrient cycling partly arises  
395 in our models from complex interactions between the speed of recycling and nutrient losses  
396 (Fig. A3-1C,D). These interactions should be further disentangled through new simulations  
397 manipulating independently rates of mineral nutrient and detritus loss that are set equal in  
398 our model while higher losses for mineral nutrients than for detritus would be more realistic,  
399 at least in terrestrial ecosystems.

400

401 Second, the amount of recycled nutrients depends on food web species biomass and on primary  
402 production, which increases linearly with nutrient inputs (Loreau, 2010). In fact, nutrient  
403 uptake by producers necessarily balances nutrient losses from all trophic levels at equilibrium  
404 (Fig. A2-4C and D). At low nutrient inputs, consumers are the main contributors to nutrient  
405 cycling, in agreement with experimental and empirical studies (Vanni, 2002; Schmitz *et al.*,  
406 2010). While nutrient losses per unit of biomass due to species metabolism are lower for

407 consumers because of their larger body mass, consumers also strongly contribute to recycling  
408 through nutrient losses associated to feeding inefficiency, This is particularly true for herbivores  
409 whose assimilation efficiency is low ( $e_{ij} = 0.45$ ) so that they produce a lot of detritus by  
410 consuming primary producers, as also emphasised by previous ecosystem models (Leroux &  
411 Loreau, 2010; Krumins *et al.*, 2015). However, at high nutrient input, food webs are dominated  
412 by primary producers, which become the main contributors to nutrient cycling. In such case,  
413 primary producers release large amounts of detritus and nutrients due to high metabolism  
414 rates and large density dependant mortalities (Fig. A2-4). At high external nutrient inputs,  
415 the total quantity of recycled nutrients is lower for food webs with higher trophic levels (Fig.  
416 A2-3 A). This seems contradictory to the results of Wang & Brose (2017) who found that higher  
417 vertical diversity (*i.e.* presence of species at higher trophic levels) increases the nutrient flow  
418 in food webs. However, results are not fully comparable between the two studies as we do not  
419 directly manipulate species richness and vertical diversity while Wang & Brose (2017) did not  
420 include nutrient recycling in their model.

421 Food web structure influences nutrient cycling through other already identified mechanisms  
422 pertaining to the quality of the produced detritus that are not included in our model. In nature,  
423 the fraction of direct recycling and the degradability of detritus can be controlled by the trophic  
424 structure of the food web. In aquatic ecosystems, top predators such as fishes produce large  
425 quantities of highly degradable detritus (Harrault *et al.*, 2012) that sustain a higher biomass  
426 of phytoplankton and zooplankton (Vanni & Layne, 1997; Harrault *et al.*, 2014). In terrestrial  
427 ecosystems, herbivores also produce excrements that are easily degraded by the soil community  
428 and lead to an increase of the primary production (McNaughton, 1984; Belovsky & Slade,  
429 2000). Primary producers can also strongly influence decomposition. In terrestrial ecosystems,  
430 plant leaf traits affect the composition and the quality of the litter (Cornwell *et al.*, 2008).  
431 These mechanisms might strongly influence food web stability through their impact on nutrient

432 availability. Including further the links between food web structure and the degradability of  
433 detritus would thus need to be tested in new versions of our model.

## 434 **Nutrient cycling and effects of feedback loops**

435 Though we found that nutrient cycling mostly destabilises food web through an enrichment  
436 effect, we also find stabilising effects of nutrient cycling through feedback loops from all trophic  
437 levels to primary producers and these effects were much stronger in our food chain model than  
438 in our food web model. These stabilising effects were visible through the decrease of the tempo-  
439 ral variability of species biomasses between the SC and C models (Fig. A2-7 A,C) that compare  
440 the effects of the addition of nutrients by nutrient cycling with and without the feedback loops.  
441 [Rip & McCann \(2011\)](#) showed that the destabilising effect of enrichment may occur due to an  
442 unbalance between species growth rates and loss rates. In our food chain model, such unbalance  
443 is decreased for primary producers in presence of feedback loops (see Fig. A2-8 in supporting  
444 information) thanks to out-of-phase dynamics of recycled nutrients and primary producers,  
445 which stabilizes population dynamics in the food chain. Indeed, when herbivore and carni-  
446 vore biomasses increase a large quantity of nutrient becomes available through recycling due  
447 to relatively low efficiency of herbivore consumption especially (Fig. A2-7C). This increased  
448 nutrient availability boosts primary production and compensates for the increased mortality  
449 due to grazing. On the contrary, when the herbivore and the predator biomasses decrease,  
450 the quantity of recycled nutrients is lower which limits the increase of primary producers due  
451 to a reduced mortality (Fig. A2-7D and Fig. A2-8). Similar results have been described by  
452 [Brown \*et al.\* \(2004a\)](#) who showed that a positive feedback loop in a food chain stabilises species  
453 densities dynamics. Although [Brown \*et al.\* \(2004a\)](#) did not consider nutrient cycling but a pos-  
454 itive effect of predators on resource uptake by prey, our results can be understood through the  
455 same kind of mechanisms. Our results contradict previous studies on food chains suggesting

456 that feedback loops generated by nutrient cycling are destabilising (DeAngelis, 1980). This  
457 discrepancy likely arises from these latter results being based on a different stability measure  
458 (*i.e.* resilience instead of temporal variability) and because previous studies did not separate  
459 enrichment effects from feedback loop effects of recycling.

460

461 Our results show that the stabilising effects of recycling loops are weaker in food webs than  
462 in food chains. By considering a different stability measure (*i.e.* resilience), Neutel & Thorne  
463 (2014) also suggested that the presence of recycling feedback loops have significant effects on  
464 food web stability only in food webs with low diversities and simple structures. In our case,  
465 such weaker effects in complex food webs might be explained by the low temporal variability  
466 of the total quantity of recycled nutrients observed in the food web model, which does not  
467 allow strong asynchrony between the dynamics of mineral nutrients and primary producers  
468 as found in the food chain model (Fig. A2-1, Fig. A2-7B,C). While the CV of recycled  
469 nutrients is in the same order of magnitude as the CV of species biomass in the food chain  
470 model, it is smaller by one order of magnitude in the food web model. Nutrient cycling is  
471 the outcome of the aggregated nutrient loss from numerous species whose dynamics are not  
472 synchronous and lead to compensation effects: when the biomasses of some species decrease,  
473 the biomasses of other species likely increase, thus keeping the total biomass and the total  
474 quantity of recycled nutrients less variable (Fig. A2-1C). Theory predicts that species diversity  
475 stabilises aggregated ecosystem properties through asynchronous species dynamics (Doak *et al.*,  
476 1998; Gonzalez & Loreau, 2008; Loreau & de Mazancourt, 2013). This rationale is supported by  
477 numerous experimental studies showing that aggregated ecosystem processes, such as primary  
478 production (Tilman, 1996; Tilman *et al.*, 2006; Schläpfer & Schmid, 1999; Loreau, 2000; Hooper  
479 *et al.*, 2005) or dead biomass decomposition (Knops *et al.*, 2001; Keith *et al.*, 2008; Gessner  
480 *et al.*, 2010; Nielsen *et al.*, 2011) are more stable over time than individual species dynamics.

481 Interestingly, our results also suggest that positive effects of biodiversity on ecosystem stability  
482 might also occur for nutrient cycling. Up to our knowledge, this hypothesis has never been  
483 fully tested in biodiversity experiments and could lead to a new research avenue.

## 484 Conclusion and perspectives

485 In an ecosystem model linking population dynamics in a food web to ecosystem functioning, we  
486 found strong effects of nutrient cycling on food web stability. Thus, ecologists need to incorpo-  
487 rate nutrient cycling in theoretical and empirical work to better predict food web stability. We  
488 identified two distinct effects of nutrient cycling. First, an enrichment effect due to the recycled  
489 nutrients that increase species persistence at low nutrient input by increasing resource avail-  
490 ability but leads to a decrease in species persistence through a paradox of enrichment at higher  
491 nutrient input. Second, a stabilising effect of the feedback loops that links each trophic level  
492 to the mineral resource through nutrient cycling. However, this stabilising effect is stronger in  
493 food chains than in complex food webs where nutrient cycling can be reduced to its enrichment  
494 effect.

495 Real ecosystems are known to differ by their dependence on external inputs of mineral nutri-  
496 ents ([Polis \*et al.\*, 1997](#); [Vadeboncoeur \*et al.\*, 2003](#); [Jickells, 2005](#); [Bokhorst \*et al.\*, 2007](#)), and  
497 ecosystems relying less on such inputs likely depend more on nutrient cycling than ecosystems  
498 depending more on external inputs. Therefore, nutrient cycling, as suggested by our results,  
499 could influence the food webs of these ecosystems in contrasted ways. For example, in ecosys-  
500 tems such as eutrophic lakes ([Vadeboncoeur \*et al.\*, 2003](#)) with high inputs of nutrients, nutrient  
501 cycling could mostly have a destabilising effect while in ecosystems with low inputs of nutrients  
502 such as Antarctic terrestrial ecosystems ([Bokhorst \*et al.\*, 2007](#)) or infertile landscapes ([Hopper,  
503 2009](#)) nutrient cycling could have a stabilising effect. In the same vein, in ecosystems with  
504 efficient nutrient cycling, nutrient losses are low so that nutrient cycling represent a very im-

505 portant source of nutrient and more likely might lead to destabilising effects.

506 The predictions of our model should be tested experimentally. For example, it would be possi-  
507 ble in mesocosms to manipulate both inputs of mineral nutrients and the efficiency of nutrient  
508 cycling (Harrault *et al.*, 2014), *e.g.* exporting an increasing proportion of detritus, and to mea-  
509 sure the response in terms of food web functioning and stability. It would also be interesting  
510 to compare food webs of different types of natural ecosystem with contrasting nutrient cycling  
511 and mineralisation rates. Typically, our model probably better corresponds to an aquatic food  
512 web (*i.e.* fully size-structured web) and aquatic and terrestrial food webs should be compared.  
513 It should be noted that the role of detritus cannot be fully appreciated in our model because  
514 there are no decomposers and no brown food web. In fact, detritus are more than a transient  
515 pool for nutrients since, in real food webs, they are resources for decomposers and are recycled  
516 through the whole brown food web (Moore *et al.*, 2004). Another important step will be to  
517 include in models a true brown food web containing decomposers feeding on detritus in parallel  
518 to the green food webs relying on photosynthesis (Moore *et al.*, 2004; Zou *et al.*, 2016). The  
519 interactions between green and brown food webs can deeply change the functioning and the  
520 stability of ecosystems (Daufresne & Loreau, 2001; Moore *et al.*, 2005; Attayde & Ripa, 2008;  
521 Zou *et al.*, 2016) but these results have so far not been tested in complex realistic food webs.

## 522 Acknowledgement

523 We thank the École Normale Supérieure, the PhD program "Ecole Doctorale Frontières du Vi-  
524 vant (FdV) – Programme Bettencourt" and the Initiative Structurante Ecosphère Continentale  
525 et Côtière (IS EC2CO) for their financial support.

## 526 Authors' contributions

527 All authors conceived the ideas and designed methodology.

528 Pierre Quévreur built the model and the code, ran the simulations analysed the data.

529 All authors participated to the writing of the manuscript.

## 530 Data accessibility

531 All data are included in the manuscript and its supporting information. The codes are available  
532 on Zenodo and GitHub ([doi:10.5281/zenodo.1143996](https://doi.org/10.5281/zenodo.1143996)).

## 533 References

534 Abrams, P.A. (1993) Effect of increased productivity on the abundances of trophic levels. *The*  
535 *American Naturalist* **141**, 351–371.

536 Anderson, T.R. (1992) Modelling the influence of food C:N ratio, and respiration on growth  
537 and nitrogen excretion in marine zooplankton and bacteria. *Journal of Plankton Research*  
538 **14**, 1645–1671.

539 Attayde, J.L. & Ripa, J. (2008) The coupling between grazing and detritus food chains and  
540 the strength of trophic cascades across a gradient of nutrient enrichment. *Ecosystems* **11**,  
541 980–990.

542 Barot, S., Ugolini, A. & Briki, F.B. (2007) Nutrient cycling efficiency explains the long-term  
543 effect of ecosystem engineers on primary production. *Functional Ecology* **21**, 1–10.

544 Belovsky, G.E. & Slade, J.B. (2000) Insect herbivory accelerates nutrient cycling and increases  
545 plant production. *Proceedings of the National Academy of Sciences* **97**, 14412–14417.

- 546 Binzer, A., Brose, U., Curtsdotter, A., Eklöf, A., Rall, B.C., Riede, J.O. & de Castro, F. (2011)  
547 The susceptibility of species to extinctions in model communities. *Basic and Applied Ecology*  
548 **12**, 590–599.
- 549 Binzer, A., Guill, C., Brose, U. & Rall, B.C. (2012) The dynamics of food chains under climate  
550 change and nutrient enrichment. *Philosophical Transactions of the Royal Society B: Biological*  
551 *Sciences* **367**, 2935–2944.
- 552 Binzer, A., Guill, C., Rall, B.C. & Brose, U. (2016) Interactive effects of warming, eutroph-  
553 ication and size structure: impacts on biodiversity and food-web structure. *Global Change*  
554 *Biology* **22**, 220–227.
- 555 Boit, A., Martinez, N.D., Williams, R.J. & Gaedke, U. (2012) Mechanistic theory and modelling  
556 of complex food-web dynamics in Lake Constance. *Ecology Letters* **15**, 594–602.
- 557 Bokhorst, S., Huiskes, A., Convey, P. & Aerts, R. (2007) External nutrient inputs into terrestrial  
558 ecosystems of the Falkland Islands and the Maritime Antarctic region. *Polar Biology* **30**,  
559 1315–1321.
- 560 Brose, U. (2008) Complex food webs prevent competitive exclusion among producer species.  
561 *Proceedings of the Royal Society of London B: Biological Sciences* **275**, 2507–2514.
- 562 Brose, U., Jonsson, T., Berlow, E.L., Warren, P., Banasek-Richter, C., Bersier, L.F., Blanchard,  
563 J.L., Brey, T., Carpenter, S.R., Blandenier, M.F.C., Cushing, L., Dawah, H.A., Dell, T.,  
564 Edwards, F., Harper-Smith, S., Jacob, U., Ledger, M.E., Martinez, N.D., Memmott, J.,  
565 Mintenbeck, K., Pinnegar, J.K., Rall, B.C., Rayner, T.S., Reuman, D.C., Ruess, L., Ulrich,  
566 W., Williams, R.J., Woodward, G. & Cohen, J.E. (2006a) Consumer–resource body-size  
567 relationships in natural food webs. *Ecology* **87**, 2411–2417.



- 568 Brose, U., Williams, R.J. & Martinez, N.D. (2006b) Allometric scaling enhances stability in  
569 complex food webs. *Ecology Letters* **9**, 1228–1236.
- 570 Brown, D.H., Ferris, H., Fu, S. & Plant, R. (2004a) Modeling direct positive feedback between  
571 predators and prey. *Theoretical Population Biology* **65**, 143–152.
- 572 Brown, J.H., Gillooly, J.F., Allen, A.P., Savage, V.M. & West, G.B. (2004b) Toward a metabolic  
573 theory of ecology. *Ecology* **85**, 1771–1789.
- 574 Cornwell, W.K., Cornelissen, J.H.C., Amatangelo, K., Dorrepaal, E., Eviner, V.T., Godoy, O.,  
575 Hobbie, S.E., Hoorens, B., Kurokawa, H., Pérez-Harguindeguy, N., Queded, H.M., Santiago,  
576 L.S., Wardle, D.A., Wright, I.J., Aerts, R., Allison, S.D., Van Bodegom, P., Brovkin, V.,  
577 Chatain, A., Callaghan, T.V., Díaz, S., Garnier, E., Gurvich, D.E., Kazakou, E., Klein,  
578 J.A., Read, J., Reich, P.B., Soudzilovskaia, N.A., Vaieretti, M.V. & Westoby, M. (2008)  
579 Plant species traits are the predominant control on litter decomposition rates within biomes  
580 worldwide. *Ecology Letters* **11**, 1065–1071.
- 581 Daufresne, T. & Loreau, M. (2001) Ecological stoichiometry, primary producer-decomposer  
582 interactions, and ecosystem persistence. *Ecology* **82**, 3069–3082.
- 583 de Mazancourt, C., Loreau, M. & Abbadie, L. (1998) Grazing optimization and nutrient cycling  
584 : When do herbivores enhance primary production? *Ecology* **79**, 2242.
- 585 DeAngelis, D.L. (1980) Energy flow, nutrient cycling, and ecosystem resilience. *Ecology* **61**,  
586 764.
- 587 DeAngelis, D.L. (1992) *Dynamics of nutrient cycling and food webs*. No. 9 in Population and  
588 community biology series, Chapman & Hall, London, 1. ed edn.
- 589 DeAngelis, D.L., Mulholland, P.J., Palumbo, A.V., Steinman, A.D., Huston, M.A. & Elwood,

- 590 J.W. (1989) Nutrient dynamics and food-web stability. *Annual Review of Ecology and Sys-*  
591 *tematics* **20**, 71–95.
- 592 Doak, D.F., Bigger, D., Harding, E.K., Marvier, M.A., O'Malley, R.E. & Thomson, D. (1998)  
593 The statistical inevitability of stability-diversity relationships in community ecology. *The*  
594 *American Naturalist* **151**, 264–276.
- 595 Fath, B.D. & Hynes, G. (2007) Cyclic energy pathways in ecological food webs. *Ecological*  
596 *Modelling* **208**, 17–24.
- 597 Fussmann, G.F., Ellner, S.P., Shertzer, K.W. & Jr, N.G.H. (2000) Crossing the Hopf bifurcation  
598 in a live predator-prey system. *Science* **290**, 1358–1360.
- 599 Gessner, M.O., Swan, C.M., Dang, C.K., McKie, B.G., Bardgett, R.D., Wall, D.H. & Hät-  
600 tenschwiler, S. (2010) Diversity meets decomposition. *Trends in Ecology & Evolution* **25**,  
601 372–380.
- 602 Gonzalez, A. & Loreau, M. (2008) The causes and consequences of compensatory dynamics in  
603 ecological communities. *Annual Review of Ecology, Evolution, and Systematics* **40**, 393–414.
- 604 Gounand, I., Mouquet, N., Canard, E., Guichard, F., Hauzy, C. & Gravel, D. (2014) The  
605 paradox of enrichment in metaecosystems. *The American Naturalist* **184**, 752–763.
- 606 Hynes, G., Fath, B.D. & Liljenström, H. (2007) The modified niche model: Including detritus  
607 in simple structural food web models. *Ecological Modelling* **208**, 9–16.
- 608 Harrault, L., Allard, B., Danger, M., Maunoury-Danger, F., Guilpart, A. & Lacroix, G. (2012)  
609 Influence of food-web structure on the biodegradability of lake sediment: *Food-web effects on*  
610 *sediment biodegradability*. *Freshwater Biology* **57**, 2390–2400.
- 611 Harrault, L., Allard, B., Mériguet, J., Carmignac, D., Huon, S., Gauzens, B. & Lacroix, G.

- 612 (2014) Bottom-up effects of lake sediment on pelagic food-web compartments: a mesocosm  
613 study. *Freshwater Biology* **59**, 1695–1709.
- 614 Hauzy, C., Nadin, G., Canard, E., Gounand, I., Mouquet, N. & Ebenman, B. (2013) Confronting  
615 the paradox of enrichment to the metacommunity perspective. *PLoS ONE* **8**, e82969.
- 616 Heckmann, L., Drossel, B., Brose, U. & Guill, C. (2012) Interactive effects of body-size structure  
617 and adaptive foraging on food-web stability: Body size, adaptivity and food-web stability.  
618 *Ecology Letters* **15**, 243–250.
- 619 Hooper, D.U., Chapin, F.S., Ewel, J.J., Hector, A., Inchausti, P., Lavorel, S., Lawton, J.H.,  
620 Lodge, D.M., Loreau, M., Naeem, S., Schmid, B., Setälä, H., Symstad, A.J., Vandermeer,  
621 J. & Wardle, D.A. (2005) Effects of biodiversity on ecosystem functioning: a consensus of  
622 current knowledge. *Ecological Monographs* **75**, 3–35.
- 623 Hopper, S.D. (2009) OCBIL theory: towards an integrated understanding of the evolution,  
624 ecology and conservation of biodiversity on old, climatically buffered, infertile landscapes.  
625 *Plant and Soil* **322**, 49–86.
- 626 Hudson, L.N. & Reuman, D.C. (2013) A cure for the plague of parameters: constraining models  
627 of complex population dynamics with allometries. *Proc. R. Soc. B* **280**, 20131901.
- 628 Jickells, T. (2005) External inputs as a contributor to eutrophication problems. *Journal of Sea*  
629 *Research* **54**, 58–69.
- 630 Keith, A.M., van der Wal, R., Brooker, R.W., Osler, G.H.R., Chapman, S.J., Burslem, D.F.R.P.  
631 & Elston, D.A. (2008) Increasing litter species richness reduces variability in a terrestrial  
632 decomposer system. *Ecology* **89**, 2657–2664.
- 633 Knops, J.M.H., Wedin, D. & Tilman, D. (2001) Biodiversity and decomposition in experimental  
634 grassland ecosystems. *Oecologia* **126**, 429–433.

- 635 Kondoh, M. (2003) Foraging adaptation and the relationship between food-web complexity and  
636 stability. *Science* **299**, 1388–1391.
- 637 Krumins, J.A., Krumins, V., Forgeston, E., Billings, L. & Putten, W.H.v.d. (2015) Herbivory  
638 and stoichiometric feedbacks to primary production. *PLOS ONE* **10**, e0129775.
- 639 Legagneux, P., Gauthier, G., Berteaux, D., Bêty, J., Cadieux, M.C., Bilodeau, F., Bolduc, E.,  
640 McKinnon, L., Tarroux, A., Therrien, J.F., Morissette, L. & Krebs, C.J. (2012) Disentangling  
641 trophic relationships in a High Arctic tundra ecosystem through food web modeling. *Ecology*  
642 **93**, 1707–1716.
- 643 Leibold, M.A. (1996) A graphical model of keystone predators in food webs: trophic regulation  
644 of abundance, incidence, and diversity patterns in communities. *The American Naturalist*  
645 **147**, 784.
- 646 Leroux, S.J. & Loreau, M. (2008) Subsidy hypothesis and strength of trophic cascades across  
647 ecosystems. *Ecology Letters* **11**, 1147–1156.
- 648 Leroux, S.J. & Loreau, M. (2010) Consumer-mediated recycling and cascading trophic interac-  
649 tions. *Ecology* **91**, 2162–2171.
- 650 Loreau, M. (1994) Material cycling and the stability of ecosystems. *The American Naturalist*  
651 **143**, 508–513.
- 652 Loreau, M. (2000) Biodiversity and ecosystem functioning: recent theoretical advances. *Oikos*  
653 **91**, 3–17.
- 654 Loreau, M. (2010) *From populations to ecosystems: theoretical foundations for a new ecological*  
655 *synthesis*. No. 46 in Monographs in population biology, Princeton Univ. Press, Princeton,  
656 NJ, oCLC: 699867402.

- 657 Loreau, M. & de Mazancourt, C. (2013) Biodiversity and ecosystem stability: a synthesis of  
658 underlying mechanisms. *Ecology Letters* **16**, 106–115.
- 659 McCann, K.S. (2011) *Food webs*. No. 50 in Monographs in population biology, Princeton Univ.  
660 Press, Princeton, NJ, oCLC: 775576741.
- 661 McNaughton, S.J. (1984) Grazing lawns: animals in herds, plant form, and coevolution. *The*  
662 *American Naturalist* **124**, 863–886.
- 663 Moore, J.C., Berlow, E.L., Coleman, D.C., Ruitter, P.C., Dong, Q., Hastings, A., Johnson,  
664 N.C., McCann, K.S., Melville, K., Morin, P.J., Nadelhoffer, K., Rosemond, A.D., Post,  
665 D.M., Sabo, J.L., Scow, K.M., Vanni, M.J. & Wall, D.H. (2004) Detritus, trophic dynamics  
666 and biodiversity. *Ecology Letters* **7**, 584–600.
- 667 Moore, J.C., McCann, K. & de Ruitter, P.C. (2005) Modeling trophic pathways, nutrient cycling,  
668 and dynamic stability in soils. *Pedobiologia* **49**, 499–510.
- 669 Mougi, A. & Nishimura, K. (2008) The paradox of enrichment in an adaptive world. *Proceedings*  
670 *of the Royal Society B: Biological Sciences* **275**, 2563–2568.
- 671 Neutel, A.M. & Thorne, M.A. (2014) Interaction strengths in balanced carbon cycles and the  
672 absence of a relation between ecosystem complexity and stability. *Ecology Letters* **17**, 651–  
673 661.
- 674 Nielsen, U.N., Ayres, E., Wall, D.H. & Bardgett, R.D. (2011) Soil biodiversity and carbon cy-  
675 cling: a review and synthesis of studies examining diversity–function relationships. *European*  
676 *Journal of Soil Science* **62**, 105–116.
- 677 Oksanen, L., Fretwell, S.D., Arruda, J. & Niemela, P. (1981) Exploitation ecosystems in gradi-  
678 ents of primary productivity. *The American Naturalist* **118**, 240–261.
- 679 O’Neill, R.V. (1976) Ecosystem persistence and heterotrophic regulation. *Ecology* **57**, 1244.

- 680 Persson, A., Hansson, L.A., Brönmark, C., Lundberg, P., Pettersson, L.B., Greenberg, L.,  
681 Nilsson, P.A., Nyström, P., Romare, P. & Tranvik, L. (2001) Effects of enrichment on simple  
682 aquatic food webs. *The American naturalist* **157**, 654–669.
- 683 Petchey, O.L., Beckerman, A.P., Riede, J.O. & Warren, P.H. (2008) Size, foraging, and food  
684 web structure. *Proceedings of the National Academy of Sciences* **105**, 4191–4196.
- 685 Polis, G.A., Anderson, W.B. & Holt, R.D. (1997) Toward an integration of landscape and food  
686 web ecology: the dynamics of spatially subsidized food webs. *Annual Review of Ecology and*  
687 *Systematics* **28**, 289–316.
- 688 Rall, B., Guill, C. & Brose, U. (2008) Food-web connectance and predator interference dampen  
689 the paradox of enrichment. *Oikos* **117**, 202–213.
- 690 Rip, J.M.K. & McCann, K.S. (2011) Cross-ecosystem differences in stability and the principle  
691 of energy flux. *Ecology Letters* **14**, 733–740.
- 692 Rosenzweig, M.L. (1971) Paradox of enrichment: destabilization of exploitation ecosystems in  
693 ecological time. *Science (New York, N.Y.)* **171**, 385–387.
- 694 Roy, S. & Chattopadhyay, J. (2007) The stability of ecosystems: A brief overview of the paradox  
695 of enrichment. *Journal of Biosciences* **32**, 421–428.
- 696 Savage, V.M., Gillooly, J.F., Brown, J.H., West, G.B. & Charnov, E.L. (2004) Effects of body  
697 size and temperature on population growth. *The American Naturalist* **163**, 429–441.
- 698 Schläpfer, F. & Schmid, B. (1999) Ecosystem effects of biodiversity: a classification of hypothe-  
699 ses and exploration of empirical results. *Ecological Applications* **9**, 893–912.
- 700 Schmitz, O.J., Hawlena, D. & Trussell, G.C. (2010) Predator control of ecosystem nutrient  
701 dynamics. *Ecology Letters* **13**, 1199–1209.

- 702 Schneider, F.D., Brose, U., Rall, B.C. & Guill, C. (2016) Animal diversity and ecosystem  
703 functioning in dynamic food webs. *Nature Communications* **7**, 12718.
- 704 Smith, V.H., Tilman, G.D. & Nekola, J.C. (1999) Eutrophication: impacts of excess nutrient  
705 inputs on freshwater, marine, and terrestrial ecosystems. *Environmental Pollution (Barking,*  
706 *Essex: 1987)* **100**, 179–196.
- 707 Thierry, A., Petchey, O.L., Beckerman, A.P., Warren, P.H. & Williams, R.J. (2011) The con-  
708 sequences of size dependent foraging for food web topology. *Oikos* **120**, 493–502.
- 709 Tilman, D. (1996) Biodiversity population versus ecosystem stability. *Ecology* **77**, 350.
- 710 Tilman, D., Reich, P.B. & Knops, J.M.H. (2006) Biodiversity and ecosystem stability in a  
711 decade-long grassland experiment. *Nature* **441**, 629–632.
- 712 Uchida, S. & Drossel, B. (2007) Relation between complexity and stability in food webs with  
713 adaptive behavior. *Journal of Theoretical Biology* **247**, 713–722.
- 714 Vadeboncoeur, Y., Jeppesen, E., Vander Zanden, M.J., Schierup, H.H., Christoffersen, K. &  
715 Lodge, D.M. (2003) From Greenland to green lakes: Cultural eutrophication and the loss of  
716 benthic pathways in lakes. *Limnology and Oceanography* **48**, 1408–1418.
- 717 Vanni, M.J. (2002) Nutrient cycling by animals in freshwater ecosystems. *Annual Review of*  
718 *Ecology and Systematics* **33**, 341–370.
- 719 Vanni, M.J. & Layne, C.D. (1997) Nutrient recycling and herbivory as mechanisms in the  
720 “top-down” effect of fish on algae in lakes. *Ecology* **78**, 21–40.
- 721 Vitousek, P.M. & Reiners, W.A. (1975) Ecosystem succession and nutrient retention: a hy-  
722 pothesis. *BioScience* **25**, 376–381.
- 723 Vucic-Pestic, O., Rall, B.C., Kalinkat, G. & Brose, U. (2010) Allometric functional response  
724 model: body masses constrain interaction strengths. *Journal of Animal Ecology* **79**, 249–256.

725 Wang, S. & Brose, U. (2017) Biodiversity and ecosystem functioning in food webs: the vertical  
726 diversity hypothesis. *Ecology Letters* .

727 Williams, R.J. & Martinez, N.D. (2000) Simple rules yield complex food webs. *Nature* **404**,  
728 180–183.

729 Yodzis, P. & Innes, S. (1992) Body size and consumer-resource dynamics. *The American Nat-*  
730 *uralist* **139**, 1151.

731 Zou, K., Thébault, E., Lacroix, G. & Barot, S. (2016) Interactions between the green and brown  
732 food web determine ecosystem functioning. *Functional Ecology* **30**, 1454–1465.
